# Supplementary material
Source: HighWire-hosted journal article supplement (https://www.cmaj.ca/highwire/filestream/58242/field_highwire_adjunct_files/2/gender-kaul-online_appendix_3.pdf)
Supplement: gender-kaul-online_appendix_3.pdf [file gender-kaul-online_appendix_3.pdf]

**Appendix 3A: Baseline characteristics of patients included in the propensity-matched analysis, by discharge status**

| Characteristic                | Discharge status; % of patients*                 |                                                  | p value |
|-------------------------------|--------------------------------------------------|--------------------------------------------------|---------|
|                               | Admitted to hospital within 48 hours<br>n = 6355 | Discharged from emergency department<br>n = 6355 |         |
| Age, yr, mean                 | 56.7                                             | 56.7                                             | 0.95    |
| Female                        | 38.7                                             | 48.0                                             | < 0.01  |
| Ambulatory care diagnosis†    |                                                  |                                                  | 0.08    |
| Acute myocardial infarction   | 6.1                                              | 5.2                                              |         |
| Unstable angina               | 13.6                                             | 14.5                                             |         |
| Stable angina                 | 18.0                                             | 17.6                                             |         |
| Chest pain                    | 62.3                                             | 62.6                                             |         |
| Metro resident‡               | 34.6                                             | 33.4                                             | 0.17    |
| Median household income, \$ § | 57 769                                           | 52 557                                           | 0.57    |

\*Unless stated otherwise.

†Refers to the main reason for provision of ambulatory care services.

‡Patient lives in Edmonton or Calgary.

§At neighbourhood level.

**Appendix 3B: Unadjusted and adjusted associations between the sex of a patient and discharge from the emergency department among the propensity-matched patients**

| Factors                                  | Odds ratio (95% confidence interval) |
|------------------------------------------|--------------------------------------|
| Sex                                      | 1.47 (1.37-1.57)                     |
| Sex + age                                | 1.47 (1.37-1.58)                     |
| Sex + age + diagnosis + household income | 1.48 (1.38-1.60)                     |
